# Supplementary material for: Redox and complexation chemistry of the CrVI/CrV-d-glucaric acid system
Source: Royal Society of Chemistry journal article supplement (doi:10.1039/c4dt00717d), 2014-01-01
Supplement: c4dt00717d1.pdf [file c4dt00717d1.pdf]

Supplementary information

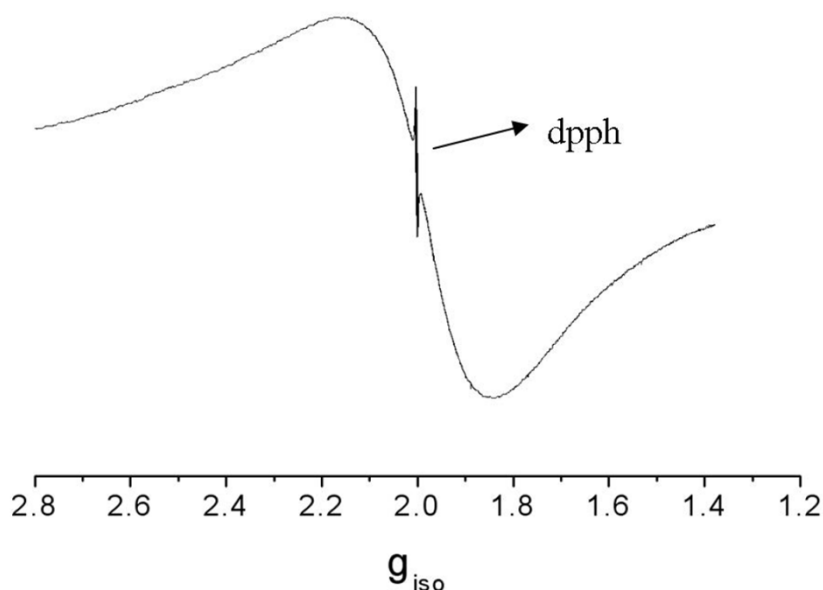

**Fig. S1:** Experimental X-band CW-EPR spectrum of  $\text{Cr}^{\text{III}}$  species. [Glucar] = 30 mM,  $[\text{H}^+] = 0.1 \text{ M}$ ;  $[\text{Cr}^{\text{VI}}] = 0.05 \text{ mM}$ ;  $F = 9.76759 \text{ GHz}$ ; Mod.Amp. = 2.0 G, Sweep Width = 500.0 G,  $T = 14 \text{ }^\circ\text{C}$ ,  $\mu = 1.0 \text{ M}$ . The spectrum was collected after 2.0 hs of mixing the reactives.

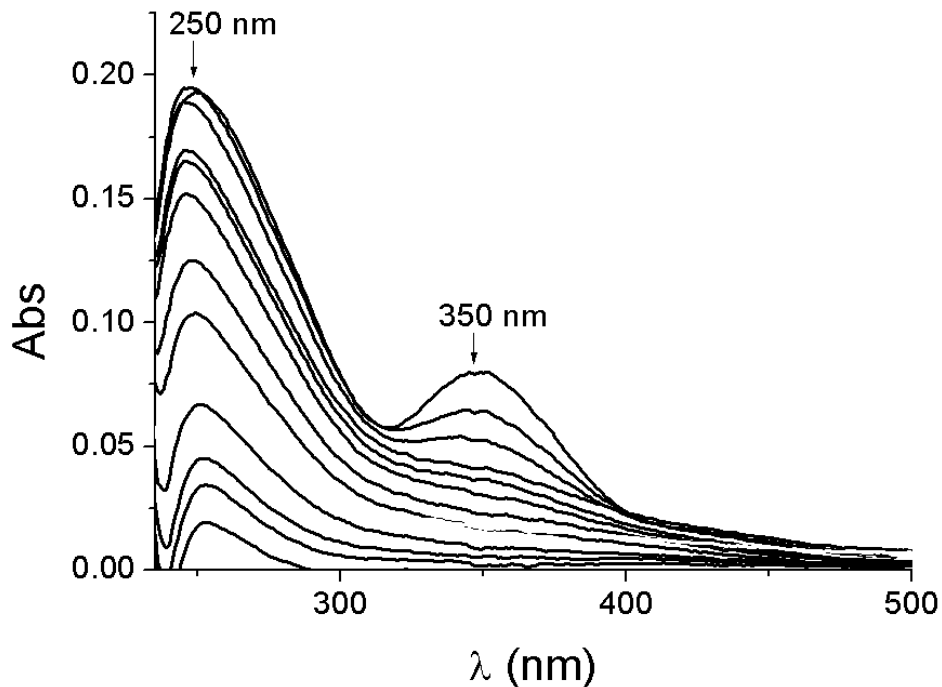

**Fig. S2:** Sequential spectra Glucar acid and  $\text{Cr}^{\text{VI}}$  reaction mixtures in anaerobic conditions: [Glucar] = 40 mM,  $[\text{HClO}_4] = 1.0 \text{ M}$ ,  $[\text{Cr}^{\text{VI}}] = 0.06 \text{ mM}$ ,  $\mu = 1.0 \text{ M}$ ,  $T = 25^\circ\text{C}$ , Ar atmosphere. Spectra were recorded every 3.0 min. No band at 290 nm was observed
